# Supplementary material
Source: PubMed Central journal article supplement (PMC4465409)
Supplement: NIHMS500112-supplement-s1.pdf [file NIHMS500112-supplement-s1.pdf]

# Supplemental results

This website holds the supplemental material for the paper "Tracking Neural Coding of Perceptual and Semantic Features of Concrete Nouns", written by Gustavo Sudre, Dean Pomerleau, Mark Palatucci, Leila Wehbe, Alona Fyshe, Riitta Salmelin, and Tom Mitchell. This manuscript was submitted to the journal Neuroimage in April 2012.

- [Rank of ROIs showing best decoding results](#) (extends Figure 3)
- [Top semantic features](#) (extends Table 2)
- [Rank of ROIs based on number of features encoded](#) (extends Figure 6)
- [List of 60 nouns + pictures, and 20 questions](#)
- [List of perceptual and semantic features](#)
