# Supplementary material
Source: PubMed Central journal article supplement (PMC4465409)
Supplement: NIHMS500112-supplement-s2.pdf [file NIHMS500112-supplement-s2.pdf]

# Rank of ROIs showing best decoding results

The different regions were ranked based on how many significant time points they showed. Then, in the situations when there was a tie in the number of significant accuracies over time, the ROIs in the tie were sorted by maximal decoding accuracy.

| Rank (out of 67) | ROI                 | Time windows (out of 17) |
|------------------|---------------------|--------------------------|
| 1                | lateraloccipital-lh | 14                       |
| 2                | lingual-lh          | 14                       |
| 3                | lingual-rh          | 13                       |
| 4                | inferiorparietal-lh | 13                       |
| 5                | fusiform-lh         | 13                       |
| 6                | lateraloccipital-rh | 13                       |
| 7                | pericalcarine-rh    | 13                       |
| 8                | cuneus-rh           | 13                       |
| 9                | pericalcarine-lh    | 13                       |
| 10               | superiorparietal-rh | 13                       |
| 11               | superiorparietal-lh | 13                       |
| 12               | precuneus-rh        | 13                       |
| 13               | cuneus-lh           | 13                       |
| 14               | inferiortemporal-rh | 13                       |
| 15               | fusiform-rh         | 13                       |
| 16               | corpuscallosum-rh   | 13                       |
| 17               | supramarginal-lh    | 12                       |
| 18               | inferiortemporal-lh | 12                       |
| 19               | precuneus-lh        | 12                       |
| 20               | inferiorparietal-rh | 12                       |
| 21               | middletemporal-lh   | 12                       |
| 22               | middletemporal-rh   | 12                       |
| 23               | supramarginal-rh    | 12                       |
| 24               | bankssts-lh         | 12                       |
| 25               | superiortemporal-rh | 12                       |
| 26               | corpuscallosum-lh   | 12                       |
| 27               | isthmuscingulate-rh | 12                       |
| 28               | superiorfrontal-rh  | 11                       |
| 29               | postcentral-rh      | 11                       |

|    |                             |    |
|----|-----------------------------|----|
| 30 | bankssts-rh                 | 11 |
| 31 | superiortemporal-lh         | 10 |
| 32 | precentral-lh               | 10 |
| 33 | paracentral-lh              | 10 |
| 34 | parahippocampal-lh          | 10 |
| 35 | precentral-rh               | 10 |
| 36 | postcentral-lh              | 10 |
| 37 | isthmuscingulate-lh         | 10 |
| 38 | rostralmiddlefrontal-rh     | 10 |
| 39 | caudalmiddlefrontal-lh      | 10 |
| 40 | posteriorcingulate-lh       | 9  |
| 41 | lateralorbitofrontal-lh     | 9  |
| 42 | rostralanteriorcingulate-rh | 9  |
| 43 | parstriangularis-lh         | 9  |
| 44 | superiorfrontal-lh          | 9  |
| 45 | medialorbitofrontal-rh      | 9  |
| 46 | parsopercularis-lh          | 9  |
| 47 | lateralorbitofrontal-rh     | 9  |
| 48 | parstriangularis-rh         | 9  |
| 49 | rostralmiddlefrontal-lh     | 8  |
| 50 | posteriorcingulate-rh       | 8  |
| 51 | rostralanteriorcingulate-lh | 8  |
| 52 | caudalmiddlefrontal-rh      | 8  |
| 53 | medialorbitofrontal-lh      | 8  |
| 54 | parahippocampal-rh          | 8  |
| 55 | paracentral-rh              | 7  |
| 56 | transversetemporal-rh       | 7  |
| 57 | parsorbitalis-rh            | 6  |
| 58 | transversetemporal-lh       | 6  |
| 59 | parsopercularis-rh          | 4  |
| 60 | caudalanteriorcingulate-rh  | 3  |
| 61 | parsorbitalis-lh            | 2  |
| 62 | entorhinal-rh               | 2  |
| 63 | caudalanteriorcingulate-lh  | 1  |
| 64 | temporalpole-lh             | 0  |

|    |                 |   |
|----|-----------------|---|
| 65 | frontalpole-rh  | 0 |
| 66 | temporalpole-rh | 0 |
| 67 | frontalpole-lh  | 0 |
