# Supplementary material
Source: PubMed Central journal article supplement (PMC4465409)
Supplement: NIHMS500112-supplement-s5.pdf [file NIHMS500112-supplement-s5.pdf]

# List of 60 nouns and pictures

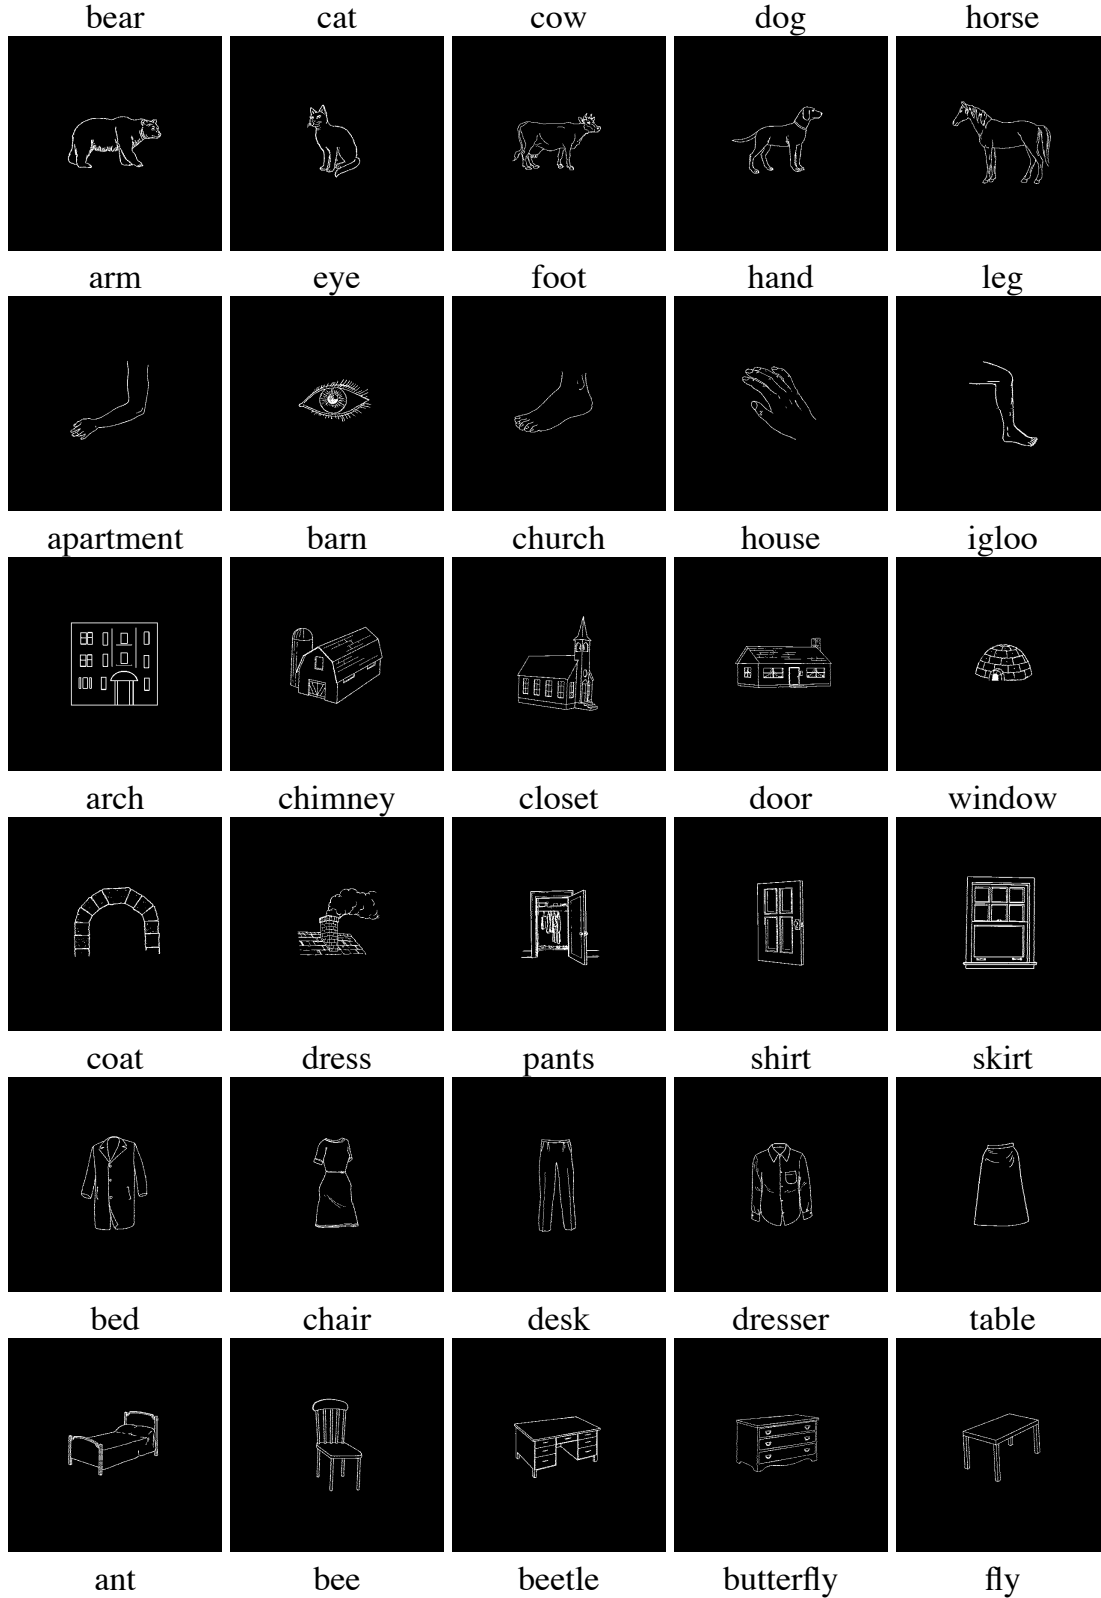

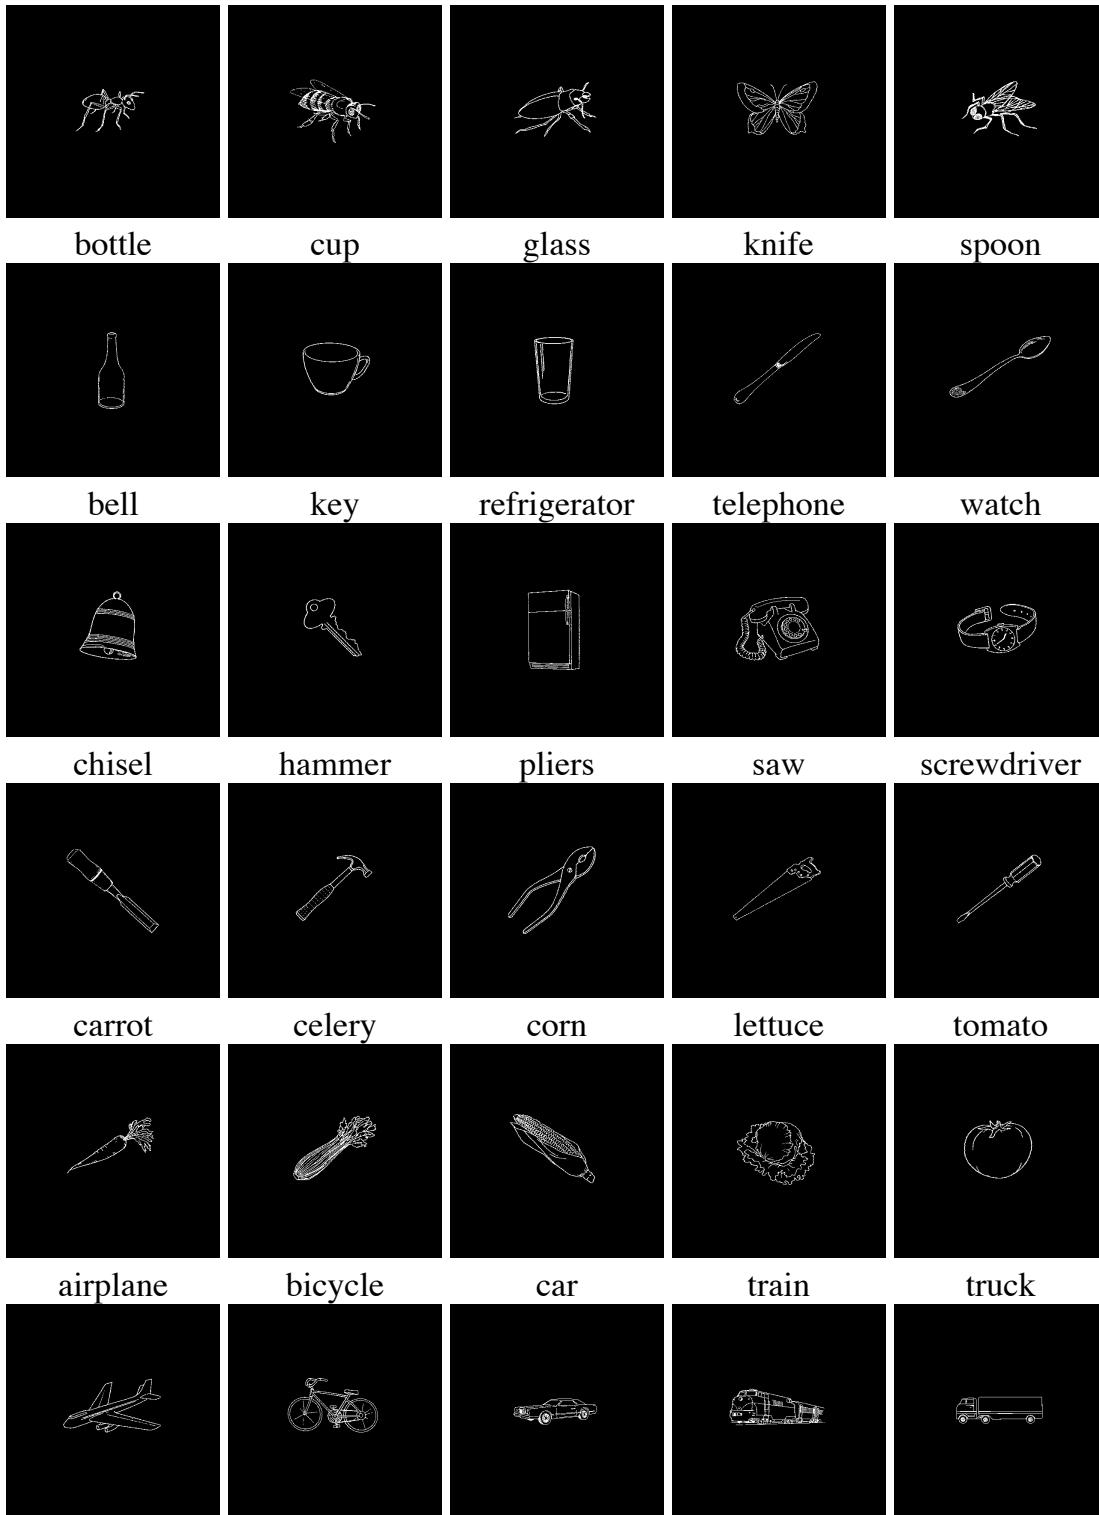

## List of 20 questions

- Is it manmade?
- Is it made of metal?
- Is it hollow?

- Is it hard to catch?
- Does it grow?
- Was it ever alive?
- Could you fit inside it?
- Does it have at least one hole?
- Can you hold it?
- Is it bigger than a loaf of bread?
- Does it live in groups?
- Can it keep you dry?
- Is part of it made of glass?
- Is it bigger than a car?
- Can you hold it in one hand?
- Is it manufactured?
- Is it bigger than a microwave oven?
- Is it alive?
- Does it have feelings?
- Can you pick it up?
