# Supplementary material
Source: PubMed Central journal article supplement (PMC4465409)
Supplement: NIHMS500112-supplement-s6.pdf [file NIHMS500112-supplement-s6.pdf]

# List of 218 semantic features

- IS IT AN ANIMAL?
- IS IT A BODY PART?
- IS IT A BUILDING?
- IS IT A BUILDING PART?
- IS IT CLOTHING?
- IS IT FURNITURE?
- IS IT AN INSECT?
- IS IT A KITCHEN ITEM?
- IS IT MANMADE?
- IS IT A TOOL?
- CAN YOU EAT IT?
- IS IT A VEHICLE?
- IS IT A PERSON?
- IS IT A VEGETABLE / PLANT?
- IS IT A FRUIT?
- IS IT MADE OF METAL?
- IS IT MADE OF PLASTIC?
- IS PART OF IT MADE OF GLASS?
- IS IT MADE OF WOOD?
- IS IT SHINY?
- CAN YOU SEE THROUGH IT?
- IS IT COLORFUL?
- DOES IT CHANGE COLOR?
- IS ONE MORE THAN ONE COLORED?
- IS IT ALWAYS THE SAME COLOR(S)?
- IS IT WHITE?
- IS IT RED?
- IS IT ORANGE?
- IS IT FLESH-COLORED?
- IS IT YELLOW?
- IS IT GREEN?
- IS IT BLUE?
- IS IT SILVER?
- IS IT BROWN?
- IS IT BLACK?
- IS IT CURVED?
- IS IT STRAIGHT?
- IS IT FLAT?
- DOES IT HAVE A FRONT AND A BACK?
- DOES IT HAVE A FLAT / STRAIGHT TOP?
- DOES IT HAVE FLAT / STRAIGHT SIDES?
- IS TALLER THAN IT IS WIDE/LONG?
- IS IT LONG?

- IS IT POINTED / SHARP?
- IS IT TAPERED?
- IS IT ROUND?
- DOES IT HAVE CORNERS?
- IS IT SYMMETRICAL?
- IS IT HAIRY?
- IS IT FUZZY?
- IS IT CLEAR?
- IS IT SMOOTH?
- IS IT SOFT?
- IS IT HEAVY?
- IS IT LIGHTWEIGHT?
- IS IT DENSE?
- IS IT SLIPPERY?
- CAN IT CHANGE SHAPE?
- CAN IT BEND?
- CAN IT STRETCH?
- CAN IT BREAK?
- IS IT FRAGILE?
- DOES IT HAVE PARTS?
- DOES IT HAVE MOVING PARTS?
- DOES IT COME IN PAIRS?
- DOES IT COME IN A BUNCH/PACK?
- DOES IT LIVE IN GROUPS?
- IS IT PART OF SOMETHING LARGER?
- DOES IT CONTAIN SOMETHING ELSE?
- DOES IT HAVE INTERNAL STRUCTURE?
- DOES IT OPEN?
- IS IT HOLLOW?
- DOES IT HAVE A HARD INSIDE?
- DOES IT HAVE A HARD OUTER SHELL?
- DOES IT HAVE AT LEAST ONE HOLE?
- IS IT ALIVE?
- WAS IT EVER ALIVE?
- IS IT A SPECIFIC GENDER?
- IS IT MANUFACTURED?
- WAS IT INVENTED?
- WAS IT AROUND 100 YEARS AGO?
- ARE THERE MANY VARIETIES OF IT?
- DOES IT COME IN DIFFERENT SIZES?
- DOES IT GROW?
- IS IT SMALLER THAN A GOLFBALL?
- IS IT BIGGER THAN A LOAF OF BREAD?
- IS IT BIGGER THAN A MICROWAVE OVEN?
- IS IT BIGGER THAN A BED?
- IS IT BIGGER THAN A CAR?
- IS IT BIGGER THAN A HOUSE?

- IS IT TALLER THAN A PERSON?
- DOES IT HAVE A TAIL?
- DOES IT HAVE LEGS?
- DOES IT HAVE FOUR LEGS?
- DOES IT HAVE FEET?
- DOES IT HAVE PAWS?
- DOES IT HAVE CLAWS?
- DOES IT HAVE HORNS / THORNS / SPIKES?
- DOES IT HAVE HOOVES?
- DOES IT HAVE A FACE?
- DOES IT HAVE A BACKBONE?
- DOES IT HAVE WINGS?
- DOES IT HAVE EARS?
- DOES IT HAVE ROOTS?
- DOES IT HAVE SEEDS?
- DOES IT HAVE LEAVES?
- DOES IT COME FROM A PLANT?
- DOES IT HAVE FEATHERS?
- DOES IT HAVE SOME SORT OF NOSE?
- DOES IT HAVE A HARD NOSE/BEAK?
- DOES IT CONTAIN LIQUID?
- DOES IT HAVE WIRES OR A CORD?
- DOES IT HAVE WRITING ON IT?
- DOES IT HAVE WHEELS?
- DOES IT MAKE A SOUND?
- DOES IT MAKE A NICE SOUND?
- DOES IT MAKE SOUND CONTINUOUSLY WHEN ACTIVE?
- IS ITS JOB TO MAKE SOUNDS?
- DOES IT ROLL?
- CAN IT RUN?
- IS IT FAST?
- CAN IT FLY?
- CAN IT JUMP?
- CAN IT FLOAT?
- CAN IT SWIM?
- CAN IT DIG?
- CAN IT CLIMB TREES?
- CAN IT CAUSE YOU PAIN?
- CAN IT BITE OR STING?
- DOES IT STAND ON TWO LEGS?
- IS IT WILD?
- IS IT A HERBIVORE?
- IS IT A PREDATOR?
- IS IT WARM BLOODED?
- IS IT A MAMMAL?
- IS IT NOCTURNAL?
- DOES IT LAY EGGS?

- IS IT CONSCIOUS?
- DOES IT HAVE FEELINGS?
- IS IT SMART?
- IS IT MECHANICAL?
- IS IT ELECTRONIC?
- DOES IT USE ELECTRICITY?
- CAN IT KEEP YOU DRY?
- DOES IT PROVIDE PROTECTION?
- DOES IT PROVIDE SHADE?
- DOES IT CAST A SHADOW?
- DO YOU SEE IT DAILY?
- IS IT HELPFUL?
- DO YOU INTERACT WITH IT?
- CAN YOU TOUCH IT?
- WOULD YOU AVOID TOUCHING IT?
- CAN YOU HOLD IT?
- CAN YOU HOLD IT IN ONE HAND?
- DO YOU HOLD IT TO USE IT?
- CAN YOU PLAY IT?
- CAN YOU PLAY WITH IT?
- CAN YOU PET IT?
- CAN YOU USE IT?
- DO YOU USE IT DAILY?
- CAN YOU USE IT UP?
- DO YOU USE IT WHEN COOKING?
- IS IT USED TO CARRY THINGS?
- CAN YOU PICK IT UP?
- CAN YOU CONTROL IT?
- CAN YOU SIT ON IT?
- CAN YOU RIDE ON/IN IT?
- IS IT USED FOR TRANSPORTATION?
- COULD YOU FIT INSIDE IT?
- IS IT USED IN SPORTS?
- DO YOU WEAR IT?
- CAN IT BE WASHED?
- IS IT COLD?
- IS IT COOL?
- IS IT WARM?
- IS IT HOT?
- IS IT UNHEALTHY?
- IS IT HARD TO CATCH?
- CAN YOU PEEL IT?
- CAN YOU WALK ON IT?
- CAN YOU SWITCH IT ON AND OFF?
- CAN IT BE EASILY MOVED?
- DO YOU DRINK FROM IT?
- DOES IT GO IN YOUR MOUTH?

- IS IT TASTY?
- IS IT USED DURING MEALS?
- DOES IT HAVE A STRONG SMELL?
- DOES IT SMELL GOOD?
- DOES IT SMELL BAD?
- IS IT USUALLY INSIDE?
- IS IT USUALLY OUTSIDE?
- WOULD YOU FIND IT ON A FARM?
- WOULD YOU FIND IT IN A SCHOOL?
- WOULD YOU FIND IT IN A ZOO?
- WOULD YOU FIND IT IN AN OFFICE?
- WOULD YOU FIND IT IN A RESTAURANT?
- WOULD YOU FIND IN THE BATHROOM?
- WOULD YOU FIND IT IN A HOUSE?
- WOULD YOU FIND IT NEAR A ROAD?
- WOULD YOU FIND IT IN A DUMP/LANDFILL?
- WOULD YOU FIND IT IN THE FOREST?
- WOULD YOU FIND IT IN A GARDEN?
- WOULD YOU FIND IT IN THE SKY?
- DO YOU FIND IT IN SPACE?
- DOES IT LIVE ABOVE GROUND?
- DOES IT GET WET?
- DOES IT LIVE IN WATER?
- CAN IT LIVE OUT OF WATER?
- DO YOU TAKE CARE OF IT?
- DOES IT MAKE YOU HAPPY?
- DO YOU LOVE IT?
- WOULD YOU MISS IT IF IT WERE GONE?
- IS IT SCARY?
- IS IT DANGEROUS?
- IS IT FRIENDLY?
- IS IT RARE?
- CAN YOU BUY IT?
- IS IT VALUABLE?

## List of 11 perceptual features

- Word length
- White pixel count
- Internal details
- Verticality
- Horizontalness
- Left-diagonalness
- Right-diagonalness
- Aspect-ratio: skinny->fat
- Prickiliness

- Line curviness
- 3D curviness
